# Supplementary material
Source: PubMed Central journal article supplement (PMC8331087)
Supplement: mmc1.pdf [file mmc1.pdf]

# THE LANCET

## Respiratory Medicine

### Supplementary appendix

This appendix formed part of the original submission and has been peer reviewed. We post it as supplied by the authors.

Supplement to: Broman LM, Eksborg S, Coco VL, et al. Extracorporeal membrane oxygenation for COVID-19 during first and second waves. *Lancet Respir Med* 2021; published online June 16. [http://dx.doi.org/10.1016/S2213-2600\(21\)00262-9](http://dx.doi.org/10.1016/S2213-2600(21)00262-9).

## **Acknowledgements**

***We thank below Euro-ELSO Steering Committee Members for the approval and a critical review of the study:***

M. Velia Antonini (Intensive Care Unit, University Hospital of Parma, Parma, Italy);

Nicholas A. Barrett, M.D., (Guy's and St Thomas' NHS Foundation Trust, London, UK);

Mirko Belliato M.D., PhD., (Department of Intensive Medicine, IRCCS Policlinico San Matteo Foundation, Pavia, Italy);

Mark Davidson, M.D., (Pediatric ICU and ECMO, Royal Hospital for Children, Glasgow, Scotland);

Matteo Di Nardo, M.D. (Pediatric Intensive Care Unit, Children's Hospital Bambino Gesù, IRCCS, Rome, Italy);

Simon Finney, M.D., Ph.D. (Dept. of Cardio-Thoracic Anesthesia and Intensive Care, Barts Health NHS Trust, London, UK);

Jo-Anne Fowles, MSc (Critical Care & ECMO, Royal Papworth Hospital NHS Foundation Trust, Cambridge, UK);

Maximilian Halbe, EC.C.P. (Dept. Cardio-Vascular surgery, University Hospital, Zurich, Switzerland);

Felix Hennig, M.D., Ph.D. (Dept. Cardiothoracic-Vascular Surgery, German Heart Institute, Berlin, Germany);

Tim Jones, M.D. (Dept. of Cardiac Surgery, Birmingham Children Hospital, Birmingham, UK);

Thomas Mueller, M.D., Ph.D. (University Medical Center Regensburg, Regensburg, Germany);

Luis Pinto (Centro Hospitalar Sao Joao, Porto, Portugal);

Jonathan Smith, M.D. (Dept. of Cardiac Surgery, Newcastle upon Tyne Hospitals NHS Foundation Trust, Newcastle, UK);

Jordi Riera, M.D., Ph.D. (Intensive Care Unit, Vall d'Hebron University Hospital, Vall d'Hebron Research Institute, Barcelona, Spain);

Peter Roeleveld, M.D. (Pediatric Intensive care, Leiden University Medical Centre, Leiden, The Netherlands);

Justyna Swol, M.D. (Pneumology Department, Paracelsus Medical University, Nuremberg, Germany);

Leen Vercaemst, R.N., EC.C.P. (Cardiac Surgery Unit, Gasthuisberg Hospital, Catholic University, Leuven, Belgium).

***We also thank for the contribution of the EuroECMO COVID-19 Working Group members listed below for providing data:***

Thijs Delnoij, M.D., Ronny Schnabel, M.D., Ph.D., Iwan van der Horst, M.D., Ph.D. (Intensive Care Unit Dept., Maastricht University Medical Centre, Maastricht, The Netherlands);

Dinis Reis Miranda, M.D. (Intensive Care Dept., ERASMUS University Hospital, Rotterdam, The Netherlands);

Marcel van der Linden, M.D., Merijn Kant (Dept. Cardiothoracic Surgery and Intensive care Unit, Breda Hospital, Breda, The Netherlands);

J.J. van der Heijden, M.D., Ph.D. (Dept. Intensive Care, University Medical Centre Utrecht, Utrecht, The Netherlands);

Erik Scholten, M.D., Ph.D. (Dept. Intensive Care, St. Antonius Ziekenhuis, Nieuwegeijn, The Netherlands);

Nicole van Belle-van Haren, M.D. (Dept. of Cardiac Surgery, St. Antonius Ziekenhuis, Nieuwegeijn, The Netherlands);

Wim Lagrand, M.D., Ph.D., Alexander P. Vlaar, M.D., Ph.D. (Dept. Intensive Care, University Medical Centre Amsterdam, Amsterdam, The Netherlands);

Sytse de Jong, EC.C.P. (Dept. Cardiothoracic Surgery, Radboud University Medical Centre, Nijmegen, The Netherlands);

Dario Candura, M.D., Ph.D. (Cardiac Surgery Dept., Leiden University Medical Centre, The Netherlands);

Jacinta Maas, M.D., M.J. van Gijlswijk van den Berg, R.N. (Intensive Care, Leiden University Medical Center, Leiden, The Netherlands);

Maarten Strauven EC.C.P. (Dept. Cardiosurgery, Ziekenhuis Oost Limburg, Genk, The Netherlands);

Maximilian Malfertheiner, M.D., Esther Dreier, M.S., Thomas Mueller, M.D., Ph.D. (University Medical Center Regensburg, Regensburg, Germany);

Udo Boeken, M.D., Ph.D., Payam Akhyari, M.D., Artur Lichtenberg, M.D. (Dept. of Cardiac Surgery, Heinrich Heine University, Dusseldorf, Germany);

Diyar Saeed, M.D., Ph.D., Holger Thiele, M.D., Ph.D. (Leipzig Heart Centre, Leipzig, Germany);

Matthias Baumgaertel, M.D., Justyna Swol, M.D. (Department of Pulmonology, Intensive Care Medicine, Paracelsus Medical University, Nuremberg, Germany);

Jan D. Schmitto, M.D., Ph.D., Silvia Mariani, M.D., Christian Napp, M.D. (Dept. Cardiac-Thoracic-Vascular Surgery, Hannover Medical School, Hannover, Germany);

Matthias Thielmann, M.D., Ph.D. (West-German Heart and Vascular Center, University of Duisburg, Essen, Germany),

Thorsten Brenner, M.D. (Dept. of Anesthesiology and Intensive Care, University Hospital, Essen, Germany);

Sven Maier, M.Sc., David Schibilsky M.D., Dawid L. Staudacher M.D., Cristoph Benk, Ph.D., Martin Czerny, M.D., M.B.A., Fridhelm Beyersdorf, M.D., Ph.D. (University Heart Center Freiburg Bad Krozingen, Bad Krozingen, Germany-Faculty of Medicine, University Freiburg, Germany);

Johannes Kalbhenn, M.D. (Dept. of Anesthesiology and Intensive Care, Medical Centre-University of Freiburg, Germany);

Philipp Henn, M.D. (Dept. of Anesthesiology and Intensive Care, University Hospital, Tübingen, Germany);

Aron-Frederik Popov, M.D., Ph.D. (Dept. of Cardio-Thoracic Surgery, University Hospital, Tübingen, Germany);

Torje Iuliu, M.D., Ralf Muellenbach, M.D., Christian Reyher MD, Caroline Rolfes M.D. (Dept. Intensive Care, ECMO Center, Kassel, Germany);

Kai Zacharowski, M.D. Ph.D., Gösta Lotz M.D., Michael Sonntagbauer M.D., Helen Winkels (Dept. of Anesthesiology, ECLS Centre Frankfurt University Hospital, Germany);

Alexander Kersten, M.D. (Department of Pneumology and Critical Care, University Hospital RWTH Aachen, Germany);

Christian Karagiannidis, M.D., Simone Schafer M.D., Alexei Svetlitchny, M.D. (Intensive Care Unit, ARDS E-ECMO Centre, Köln-Merheim, Germany);

Julia Fichte, M.D., Hans-Bernd Hopf, M.D. (Asklepios Klinik Langen, Dept. Of Anesthesia, perioperative Medicine and interdisciplinary Intensive Care Medicine, ECLS-ECMO center Langen, Cardiac arrest center Langen, Langen, Germany);

Felix Henning, M.D. (Heart Center, Berlin, Germany)

Steffen Weber-Carstens, M.D., Ph.D., Martin Witzernath, M.D., Ph.D. (Charite' Medical School, Berlin, Germany);

Robertas Samalavicius, M.D., Ph.D. (Vilnius University Hospital Santariškių Klinikos, Vilnius, Lithuania);

Juozas Kapturauskas (Kaunas University Hospital, Lithuania)

Luca Lorini, M.D., Davide Ghitti, EC.C.P., Lorenzo Grazioli, M.D. (Dept. of Intensive Care, Papa Giovanni XXIII Hospital, Bergamo, Italy);

Antonio Loforte, M.D., Massimo Baiocchi, M.D., Erika Dal Checco, M.D., Davide Pacini, M.D. (Dept. Cardio-Thorac-Vascular Surgery and Intensive Care Unit, S. Orsola University Hospital, Bologna, Italy);

Paolo Meani, M.D., Antioco Cappai, M.D. (Cardiology Unit, Niguarda Hospital, Milan, Italy);

Antioco Cappai, M.D., Claudio Francesco Russo, M.D., Maurizio Bottiroli, M.D. (Cardiac Surgery Unit, Niguarda Hospital, Milan, Italy);

Michele Mondino, M.D. (Cardio-Thoracic Surgery Intensive Care Unit, Niguarda Hospital, Milan, Italy);

Marco Ranucci, M.D., Dario Fina, M.D., Mauro Cotza, M.D., Andrea Ballotta, M.D. (Dept. Intensive Care, IRCCS Policlinico San Donato Hospital, Milan, Italy);

Anna Mara Scandroglio, M.D., Alberto Zangrillo, M.D., Marina Pieri, M.D., Pasquale Nardelli, M.D., Evgeny Fominskiy, M.D., Giovanni Landoni, M.D. (Dept. of Anesthesia and Intensive Care, IRCCS, San Raffaele Scientific Institute, Milan, Italy);

Vito Fanelli, M.D., Luca Brazzi, M.D., Ph.D., Giorgia Montrucchio, M.D., Gabriele Sales, M.D., Umberto Simonetti, M.D., Rosario Urbino, M.D. (Department of Anaesthesia and Critical Care - AOU Città della Salute e della Scienza di Torino – University of Turin, Italy);

Sergio Livigni, M.D. (Dept. Intensive Care, S. Giovanni Bosco Hospital, Turin, Italy);

Mirko Belliato, M.D. (UOC Anestesia e Rianimazione 1, Foundation IRCCS Policlinico San Matteo, Pavia, Italy);

Antonella Degani, EC.C.P. (Cardio-Thoracic Unit, IRCCS Policlinico San Matteo, Pavia, Italy);

Giuseppe Raffa, M.D., Ph.D., Michele Pilato, M.D. (Dept. of Cardiac Surgery, IRCCS-ISMETT Hospital, Palermo, Italy);

Gennaro Martucci, M.D., Antonio Arcadipane, M.D. (Dept. of Anesthesia and Intensive Care, IRCCS-ISMETT Hospital, Palermo, Italy);

Giovanni Chiarini, M.D., Nicola Latronico, M.D., Sergio Cattaneo, M.D., Carmine Puglia, M.D. (Dept. Intensive Care, Spedali Civili Hospital, Brescia, Italy);

Gianfranco Reina, M.D. (Dept. Intensive Care dell'Angelo Hospital Venice/Mestre, Mestre, Italy);

Sandro Sponga, M.D., Ph.D., Ugolino Livi, M.D. (Cardiac Surgery Department, University Hospital of Udine, Udine, Italy);

Giuseppe Foti, M.D., Marco Giani, M.D., Roberto Rona, M.D., Leonello Avalli, M.D., Michela Bombino, M.D., Maria Cristina Costa, EC.C.P. (Dept. of Emergency and Intensive Care, S. Gerardo Hospital, Monza, Italy);

Roberto Carozza, EC.C.P., Abele Donati, M.D., Francesco Gaspari, (University ICU, Ospedali Riuniti, Lancisi Cardiovascular Center, AOU Riuniti Hospital, Ancona, Italy);

Marco Picichè, M.D., Ph.D., Alessandro Favaro, M.D., Loris Salvador, M.D. (Dept. Cardiac Surgery, S. Bortolo Hospital, Vicenza, Italy);

Vinicio Danzi, M.D., Anita Zanin, M.D. (Dept. of Anesthesia and Intensive Care, S. Bortolo Hospital, Vicenza, Italy);

Ignazio Condello, EC.C.P., Flavio Fiore, M.D., Ph.D., Marco Moscarelli, M.D., Ph.D., Giuseppe Nasso, M.D., Ph.D., Giuseppe Speziale, M.D., Ph.D. (Cardiac Surgery Dept., Gruppo Villa Maria Hospitals, Bari, Italy);

Luca Sandrelli, M.D. (Cardiac Surgery Unit, S. Giorgio Clinic, Alessandria, Italy);

Andrea Montalto, M.D., Francesco Musumeci, M.D. (Cardiac Surgery Unit, S. Camillo Hospital, Rome, Italy);

Alessandro Circelli, M.D., Emiliano Gamberini, M.D., Emanuele Russo, M.D., Marco Benni, M.D., Vanni Agnoletti, M.D. (Dept. of Intensive Care, Bufalini Hospital, Cesena, Italy);

Ruggero Rociola, EC.C.P., Aldo D. Milano, M.D. (Dept. Cardiac Surgery, Policlinico Hospital, Bari, Italy);

Salvatore Grasso, M.D., Antonio Civita, M.D., Francesco Murgolo, M.D. (Anesthesiology Dept. Policlinico Hospital, Bari, Italy);

Emanuele Pilato, M.D., Giuseppe Comentale, M.D. (Dept. Cardiac Surgery, Federico II University Hospital, Naples, Italy);

Andrea Montisci, M.D. (Department of Cardiac Anesthesia and Intensive Care, Sant'Ambrogio Cardiothoracic Center, Milan, Italy);

Francesco Alessandri M.D., Antonella Tosi M.D., Francesco Pugliese M.D. (Dept. of Anaesthesiology and Intensive Care, "Sapienza" University of Rome, Policlinico Umberto I, Rome, Italy);

Simone Carelli M.D., Domenico Luca Grieco M.D., Massimo Antonelli M.D. (Dept of Anesthesiology, Intensive Care and Emergency Medicine, Fondazione Policlinico Universitario Agostino Gemelli IRCCS, Rome, Italy);

Enrico Ramoni M.D. (Dept. Intensive and Sub-Intensive Care Unit, Istituto Clinico Casalpalocco, Rome-3 Covid Hospital, Rome, Italy);

Matteo Di Nardo, M.D. (Pediatric Critical Care Unit, Bambino Gesù Children Hospital, Rome, Italy);

Francesco Maisano, M.D. (Dept. Cardio-Vascular surgery, University Hospital, Zurich, Switzerland);

Dominique Bettex, M.D. (Dept. of Cardio-Thoracic Anesthesia, University Hospital, Zurich, Switzerland);

Maximilian Halbe, Raed Aser, M.D., Stefano Benussi (Dept. Cardio-Vascular surgery, University Hospital, Zurich, Switzerland);

Alberto Weber, M.D., Jurg Grunenfelder, M.D. (Dept. Cardia-Vascular Surgery, Herzzentrum, Zurich, Switzerland);

Gianluca Agus (Cardiocentro Ticino, Lugano, Switzerland);

Jolanda Consiglio, EC.C.P., Jenni Hansjoerg, EC.C.P. (Dept. Cardiothoracic surgery, University Hospital, Bern, Switzerland);

Matthias Haenggi, M.D. (Department of Intensive Care Medicine, University Hospital Bern, University of Bern, Bern, Switzerland);

Thomas Doeble, EC.C.P., Urs Zenklusen, EC.C.P. (Division of Cardiac Surgery, University Hospital Basel, Basel, Switzerland);

Xavier Bechtold, EC.C.P. (CHUV, Centre Hospitalier Universitaire Vaudois, Lausanne, Switzerland);

Raphael Giraud, Gerald Richard (University Hospital, Geneva, Switzerland);

Bernard Stockman, M.D. (Dept. of Cardiac Surgery, OLV Hospital Aalst, Belgium);

Daniel De Backer, M.D., Simone Giglioli, M.D. (Dept. of Intensive Care, CHIREC Hospitals, Université Libre de Bruxelles, Brussels, Belgium);

Bart Meyns, M.D., Ph.D., Leen Vercaemst, R.N., EC.C.P. Greet Herman Ph.D., Philippe Meersseman, M.D., Christophe Vandenbrielle, Ph.D., Dieter Dauwe, Ph.D., Dirk Vlasselaers, Ph.D. (Cardiac Surgery Unit, Medical Intensive Care, Cardiac Intensive Care, Gasthuisberg Hospital, Catholic University, Leuven, Belgium);

Matthias Raes, M.D. (Dept. Intensive Care, University Hospital Brussels, Belgium);

Gerdy Debeuckelaere, EC.C.P., Inez Rodrigus, M.D., Ph.D., Mathias Allegaert (University Hospital Antwerp, Antwerp, Belgium);

Patrick Biston, M.D., Michael Piagnerelli, M.D., Ph.D. (Dept. Intensive Care, CHU Marie Curie, Charleroi, Belgium);

Harlinde Peperstraete, M.D. (Dept. Intensive Care, University Hospital, Ghent, Belgium);

Korneel Vandewiele, EC.C.P (Department of Perfusion University Hospital, Ghent, Belgium);

Olivier Germay, EC.C.P. (Perfusion Dept., Anesthesia Dept., CHU St Pierre de Bruxelles, Université Libre de Bruxelles, Belgium);

Dimitri Vandeweghe, EC.C.P., Ine Witters, M.D., Sven Havrin, EC.C.P., Marc Bourgeois, M.D. (Dept. of Critical Care and Anesthesia, Az Sint Jan brugge - Oostende av, Bruges, Belgium);

Fabio Silvio Taccone, M.D., Ph.D., Leda Nobile, M.D., Olivier Lheureux, M.D., Alexandre Brasseur, M.D., Jacques Creteur, M.D. (Dept. of Intensive Care, Erasme Hospital, Université Libre de Bruxelles, Brussels, Belgium);

Marc-Gilbert Lagny, EC.C.P., Ph.D., Jean-Olivier Defraigne, M.D., Ph.D., Benoît Misset, M.D., Ph.D. (CHU Sart Tilman, Liege, Belgium);

Romain Courcelle, M.D. (Dept. Intensive Care, Pole Hospitalier Jolimont, La Luviere Hospital, Belgium);

Philippe Jr. Timmermans, M.D., Jeroen Lehaen CCP, EC.C.P., Michiel Vantomout, Alaaddin Yilmaz, M.D. (Dept. Cardiac Intensive Care, Jessa Hospital, Hasselt, Belgium);

Luc Sermeus, Dominique Thiry (UCL Saint Luc, Brussels, Belgium)

Herbert Gutermann, Maarten Strauven (Oost Limburg Hospital, Genk, Belgium)

Piet Lormans, M.D., Bruno Verhamme, M.D., Frederik Bonte EC.C.P (AZ Delta Hospital, Roeselare, Belgium);

Miguel Ángel Castro, M.D. (Cardiac Surgery Dept., Vall d'Hebron Hospital, Vall d'Hebron Research Institute, Barcelona, Spain);

Elisabet Gallart, R.N., Ph.D., María Martínez-Martínez, M.D., Eduard Argudo, M.D., Marina García-de-Acilu, M.D. (Intensive care Unit, Vall d'Hebron Hospital, Vall d'Hebron Research Institute, Barcelona, Spain);

Raul de Pablo Sanchez, M.D., Ph.D. Aaron Blandino Ortiz, M.D. (Dept. Intensive Care, Ramón y Cajal University Hospital. Alcalá de Henares University, Madrid, Spain);

Mari-Paz Fuset Cabanes, M.D. (Intensive Care Unit, University Hospital of Bellvitge, Barcelona, Spain);

Karina Osorio Higa, M.D., Albert Miralles Cassina, M.D., Daniel Ortiz Berbel, M.D. (Dept. of Cardiac Surgery, University Hospital of Bellvitge, Barcelona, Spain);

Jose Carlos Sánchez-Salado, M.D. (Coronary Intensive Care Unit, Cardiology Dept., University Hospital of Bellvitge, Barcelona, Spain);

Arnau Blasco-Lucas, M.D., Ph.D., Fabrizio Sbraga, M.D. (Department of Cardiac Surgery, University Hospital of Bellvitge, L'Hospitalet de Llobregat, Barcelona, Spain);

Pablo Ruiz de Gopegui, M.D. (Critical Care Dept., Miguel Servet University Hospital, Zaragoza, Spain);

Pilar Ricart, M.D., Ph.D. (Critical Care Dept. Hospital Universitari Germans Trias i Pujol, Barcelona, Spain);

Elena Sandoval, M.D. (Cardiovascular Surgery Dept., ICCV, Hospital Clínic, Barcelona, Spain);

Javier Veganzones, M.D. (Anesthesiology Dept., Hospital Universitario La Paz, Madrid, Spain);

Pablo Millán (Crítical Care Dept., Hospital Universitario La Paz, Madrid, Spain);

Enrique Pérez de la Sota, M.D. FECTS, Benguria Puebla David (Cardiac Surgery Department, 12 de Octubre University Hospital, Madrid, Spain);

Patricia Santa Teresa M.D., Ph.D. (Intensive Care Unit, Hospital Universitario Gregorio Maranon, Madrid, Spain);



Sara Alcantara M.D. (Intensive Care Unit, Jessica Garcia Anesthesiology Dept., Hospital Universitario Puerta de Hierro Majadahonda, Madrid, Spain);

Jorge Duerto Alvarez, M.D., Ph.D. (Intensive Care Unit, Clinico San Carlos University Hospital, Madrid, Spain);

Ánxela Vidal González, M.D. (University Hospital Fundación Jiménez Díaz and University Hospital Rey Juan Carlos, Madrid, Spain);

Marta Lopez, M.D. (Intensive Care Unit, Hospital de Valdecilla, Santander, Spain);

Antonio Gordillo, M.D. (Intensive Care Unit, Hospital Puerta del Mar, Cadiz, Spain);

Josè Naranjo-Izurieta, M.D. (Intensive Care Unit, Hospital Reina Sofia, Cordoba, Spain);

Ricardo Gimeno Costa, M.D. (Critical Care Dept., Hospital Universitari I Politècnic La Fe, Valencia, Spain);

Carlos L. Albacete Moreno, M.D., Ph.D. (Critical Care Dept., Adult ECMO Program, Virgen de la Arrixaca University Clinic Hospital, Murcia, Spain);

José Ángel de Ayala, M.D., Pablo Blanco-Schweizer, M.D. (Critical Care Department, ARF & ECMO Program, Hospital Universitario Río Hortega, Valladolid, Spain);

Nicolás Hidalgo Andrés, M.D. (Critical Care Dept., Hospital Clínico Universitario, Valladolid, Spain);

Victoria Boado, M.D. (Critical Care Dept., Hospital Universitario Cruces Barakaldo, Bilbao, Spain);

José María Núñez Martínez, M.D. (Critical Care Dept., Hospital de Vinalopó Elche-Crevillente, Alicante, Spain);

Vanesa Gómez Casal, M.D. (Critical Care Dept., Hospital Álvaro Cunqueiro, Vigo, Spain);

Esperanza Fernández García, M.D. (Critical Care Dept., Hospital Universitario Virgen Macarena, Sevilla, Spain);

Luis Martín-Villén, M.D. (Unidad de Gestión Clínica de Medicina Intensiva, Hospital Universitario Virgen del Rocío, Sevilla, Spain);

Joaquín Colomina Climent, M.D. (Critical Care Dept., Hospital Universitari Son Espases, Palma de Mallorca, Spain);

Luis F. Pinto, M.D. (Cardiac Surgery Unit, Sao Joao University Hospital, Porto, Portugal);

Pascal Leprince, M.D., Ph.D. (Cardiac Surgery Dept., Assistance Publique-Hôpitaux de Paris, Pitié-Salpêtrière Hospital);

Guillaume Lebreton, M.D., Ph.D. (Cardio-Thoracic Surgery Intensive Care Unit Dept., Assistance Publique-Hôpitaux de Paris, Pitié-Salpêtrière Hospital);

Charles Juvin, M.D., Matthieu Schmidt, M.D., Ph.D., Marc Pineton, M.D., Ph.D., Alain Combes, M.D., Ph.D. (Medical Intensive Care Unit, Assistance Publique-Hôpitaux de Paris, Pitié-Salpêtrière Hospital, Paris, France);

Thierry Folliguet, M.D., Ph.D., Gabriel Saiydoun, M.D. (Dept. Cardiothoracic and Vascular Surgery, Henri Mondor Hospital, Paris, France);

Philippe Gaudard, M.D., Ph.D., Pascal Colson, M.D., Ph.D. (Univ Montpellier, PhyMedExp, INSERM, CNRS, Dept. Anaesthesiology and Intensive Care, CHU Montpellier, Montpellier, France);

Matteo Pozzi, M.D., Ph.D., Jean-Francois Obadia, M.D., Ph.D. (Dept. Cardiac Surgery, Louis Pradel Cardiologic Hospital, Lyon, France);

Jean Luc Fellahi, M.D., Ph.D. (Dept. of Anesthesia and ICU, Louis Pradel Cardiologic Hospital, Lyon, France);

Laurent Bitker, M.D., Hodane Yonis, M.D., Jean Christophe Richard, M.D., Ph.D. (Dept. of Medical ICU, Croix Rousse Hospital, Lyon, France);

Alessandro Parasido, EC.C.P., Jean-Philippe Verhoye, M.D., Ph.D., Erwan Flecher, M.D., Ph.D., Lucrezia Ajrhourh, EC.C.P. (Cardiac Surgery Dept., CHU University Hospital, Rennes, France);

Nicolas Nesseler, M.D., Alexandre Mansour M.D. (Anesthesiology Dept., CHU University Hospital, Rennes, France);

Pierre-Grégoire Guinot M.D., Ph. D. (Center of Anesthesia and Surgical Revives, Unitécardiovasculaire, Centre Hospitalier Universitarie de Dijon, Université de Bourgogne Franche-Comtè, Dijon, France);

Jonathan Zarka, M.D. (Dept. Intensive Care de Marne-la Vallée Hospital Center-Jossigny, France);

Patricia Besserve, M.D. (Department of Intensive Care Unit, CHU, Amiens, France);

Maged Makhoul, M.D., Gil Bolotin, M.D., Ph.D. (Dept. of Cardio-thoracic Surgery, Rambam Health Care Campus, Haifa, Israel);

Yigal Kassif, M.D. (Cardiac Surgery Unit, ECMO Service, Sheba, Tel Ha Shomer, Israel);

Dimitros Soufleris, M.D. (Cardiac Surgery Dept., Athens Medical Center, Athens, Greece);

Peter Schellongowski, M.D. (Dept. Intensive Care, Medical University Hospital, Vienna, Austria);

Nikolaos Bonaros, M.D., Ph.D., Christoph Krapf, M.D., Kathrin Ebert, M.D., Peter Mair, M.D., Juliane Kilo, M.D. (Dept. of Cardiac Surgery, Medical University Hospital of Innsbruck, Austria);

Florian Kothleitner, (Dept. Cardiac Surgery, University Hospital, St. Polten-Lilienfeld, Austria);

Mariusz Kowalewsky, M.D., Piotr Suwalski, M.D. (Dept. Cardiothoracic Surgery, Central Clinical Hospital Warsaw, Poland);

Steffen Christensen, M.D., Ph.D. (Aarhus University Hospital, Denmark);

Finn Møller Pedersen, M.D. (Cardiothoracic Intensive Care Unit, University Hospital, Copenhagen, Denmark);

Martin Balík, M.D., Ph.D., Jan Bláha, M.D., Ph.D., Michal Lipš, M.D., Michal Otáhal, M.D. (Dept. of Anesthesia, Resuscitation and Intensive Care Medicine, Complex Cardiovascular Centre, General University Hospital, Charles University, Prague, The Czech Republic);

Radim Spacek (Trinec University Hospital, The Czech Republic);

Luigi Camporota, M.D., Kathleen Daly, M.D., Nicola Agnew, M.D. (Intensive Care Unit, Guy's and St. Thomas's Hospital and NHS Foundation Trust, London, UK);

Simon J Finney, M.D., Barts Health HNS Trust, London, UK);

Gail Faulkner (Leicester University Hospital, Leicester, UK);

Julian Barker, M.D., Laura Head, M.D., Miguel Garcia, M.D. (Cardiothoracic Critical Care Unit, Wythenshawe Hospital, Manchester, UK);

Olivia Moore (Royal Papworth Hospital, Cambridge, UK);

Georg Auzinger, M.D., Sameer Patel, M.D., Elton Gelandt, Lisa Morgan (Kings College Hospital, London, UK);

Stephane Ledot, MD., Verna Aquino, Rebecca Lewis, M.D., Jennifer Worthy, M.D., Hamza Noor, M.D. (Intensive Care Unit, Royal Brompton & Harefield, London, UK);

Ian Scott, M.D. (Dept. of Anesthesia and Intensive Care, Aberdeen Royal Infirmary, Aberdeen, UK);

Serena O'Brien, M.Sc., Ian Conrick-Martin, M.D., Edmund Carton, M.D. (Dept. of Critical Care Medicine, Mater Misericordiae University Hospital, Dublin, Ireland);

Stuart Gillon, M.D. (Dept. of Anaesthesia, Royal Infirmary Hospital, Edinburgh, Scotland);

Ian Scott M.D., Lucy Sim, R.N. (Aberdeen Royal Infirmary, Foresterhill Health Campus, Aberdeen, Scotland);

Lars Mikael Broman, M.D., Ph.D. (ECMO Centre Karolinska, Karolinska University Hospital, Stockholm, Sweden);

Edgars Grins, M.D. (Cardiothoracic ICU, Lund University Hospital, Lund, Sweden);

Michail Ketskalo, M.D., Sergey Tsarenko, M.D., Ivan Afujov, Alexandra Shilova (Dept. of Anaesthesia and ICU, ECMO Center of Moscow City Hospital, Moscow, Russian Federation);

Konstantin Popugaev M.D. (Regional Vascula Center, Sklifosoysky, N.V. Research Institute of Emergency Medicine, Moscow, Russian Federation);

Sergei Minin, M.D. (Botkin Infection Hospital & Almazov Centre, S:t Petersburg, Russian Federation);

Olga Malceva, M.D. (State Pediatric Medical University, S:t Petersburg, Russian Federation);

Igor Kornilov, M.D., Ph.D. (Intensive Care Unit, Novosibirsk National Medical Center, Novosibirsk, Russian Federation);

Alexander Skopets, M.D. (Krasnodar Regional Hospital, Krasnodar, Russian Federation);

Roman Kornelyuk, M.D., Ph.D. (Kemerovo Hospital, Kemerovo, Russian Federation);

Alexandr Turchaninov, M.D., Ph.D. (Federal Center for Cardiovascular Surgery, Chelyabinsk, Russian Federation);

Maxim Petrushin (Tver, Russian Federation);

Daniil Shelukhin, M.D., Ph.D. (Dept. of Anaesthesiology and Intensive Care, The Nikiforov Russian Center of Emergency and Radiation Medicine, Saint Petersburg, Russian Federation);

Vojka Gorjup M.D., Ph.D. (Dept. of Intensive Internal Medicine of the University Medical Centre, Ljubljana, Slovenia);

Kaan Kirali, M.D., Ph.D. (Kosuyolu High Speciality Education and Research Hospital, Istanbul, Turkey);

Basar Cander, M.D. (Dept. of Emergency Medicine, Kanuni Sultan Suleyman Training and Research Hospital, Istanbul, Turkey);

Murat Sargin, M.D. (Dept. of Cardiovascular Surgery, Dr. Siyami Ersek Cardiovascular Surgery Research and Training Hospital, Istanbul, Turkey);

Mehmet Ali Kaygin M.D. (Dept. of Cardiovascular Surgery, Health Sciences University Erzurum Regional Training and Research Hospital, Erzurum, Turkey);

Liana Shestakova, M.D. (Dept. Cardiothoracic Surgery, Republic Center Cardiology, Minsk, Belarus);

Severin Puss, M.D. (Dept. Anesthesia and Intensive Care, North Regional Hospital & Tartu University Clinic, Tallinn, Estonia);

Heinsar Silver, Indrek Rätsep (Tallinn, Estonia);

Andrey Vysotskyi (Ukraine);

Gro Soerensen, M.D. (Dept. of Cardiothoracic Surgery, Oslo University Hospital, Rikshospitalet, Oslo, Norway);

Rosén Magnus, M.D. (Dept. Cardiovascular Surgery, University Hospital Linköping, Sweden);

Mikael Kanetoft, EC.C.P., Marcus Eidevald (Dept. Cardiovascular Surgery, University Hospital, Örebro, Sweden);

Pia Watson R.N., B.Sc., Bengt Redfors, M.D., Ph.D. (Cardiothoracic Intensive Care Unit, Sahlgrenska University Hospital, Gothenburg, Sweden);

Niklas Krenner, Mag., MSc (Dept. of Perfusion and VAD-Coordination, Kepler University Hospital, Linz, Austria).
